# Supplementary material
Source: publisher site journal article supplement (https://www.dovepress.com/get_supplementary_file.php?f=463276.docx)
Supplement: Supplementary file 1 [file get_supplementary_file.php]

**Supplementary Materials**

**CONTENTS**

[**APPENDIX AThe definiton of Control and Outcome Variables 1**](#_Toc166949768)

[**APPENDIX B STATA Commands for synth2 3**](#_Toc166949769)

[**APPENDIX C Trends in Hospitalization Metrics in 21 cities in Sichuan Province from 2012 to 2021 4**](#_Toc166949770)

[**APPENDIX D Treament effect on Hospitalizaiton Metrics 8**](#_Toc166949771)

[**APPENDIX E Leave-one-out robustness test results 10**](#_Toc166949772)

**APPENDIX AThe definiton of Control and Outcome Variables**

| Table A1 The definiton of variables | | |
| --- | --- | --- |
| Variables | Indicators | Definition |
| Control Variables | | |
| Demographic and Socioeconomic Indicators | | |
| x1 | Number of resident population (10,000 people) | This metric represents the count of individuals who have habitually resided in the specific city for over six months within a year, as recognized internationally for demographic statistics. Due to the substantial disparity in magnitude compared to other scalar values, we opt for logarithmic transformation. |
| x2 | Urbanization rate (proportion of urban population) (%) | This rate measures urbanization within the specified city, defined as the proportion of the urban resident population to the total resident population, serving as a demographic indicator of urban growth. |
| x3 | GDP per capita (yuan) | It is the quotient of a city's GDP within a fiscal year divided by the resident population, reflecting the populace's average economic prosperity. Due to the substantial disparity in magnitude compared to other scalar values, we opt for logarithmic transformation. |
| Medical Resource Indicators | | |
| x4 | Annual hospitalizations per capita (times) | This rate represents the number of hospitalizations per capita per year within the specified city and is calculated by dividing the total number of hospitalizations per year by the resident population of the city. |
| x5 | Number of health care institutions (units) | This is a tally of healthcare service providers in the specified city, licensed by the health administration, which includes hospitals and other primary and specialized health institutions. Due to the substantial disparity in magnitude compared to other scalar values, we opt for logarithmic transformation. |
| x6 | Number of beds per 1,000 population (beds) | This represents the sum of hospital and health center beds per 1,000 residents within the specified city, providing a measure of healthcare infrastructure. |
| x7 | Number of practicing physicians per 1,000 population (persons) | This indicates the density of licensed physicians actively engaged in medical and preventive healthcare within the specified city, per 1,000 residents. |
| x8 | Hospital bed occupancy rate (%) | This efficiency metric for medical resource utilization is calculated as the ratio of occupied bed days to available bed days within the specified city, expressed as a percentage. |
| Output Variables | | |
| y1 | Average Length of Hospital Stay (Days) | This refers to the average number of days a patient spends in the hospital within the particular city, calculated by dividing the total number of bed days occupied by discharged patients within the city by the number of discharges within the same city. |
| y2 | Average Cost per Hospitalization (RMB) | Also known as "per capita medical expenses for discharged patients," it is calculated by dividing the total medical and pharmaceutical revenue generated from all inpatients within the city by the number of discharges within the same city. This metric stresses the cumulative medical and pharmaceutical revenue attributed to all inpatients within the specified city. |
| y3 | Average Cost of Medication per Discharge (RMB) | This represents the average cost of medication for discharged patients within the particular city, calculated by dividing the total medication expenses within the city by the number of discharges within the same city. |
| y4 | Average Cost of Diagnostic and Treatment Procedures per Discharge (RMB) | This refers to the average cost of diagnostic tests and treatment procedures for discharged patients within the particular city, calculated by dividing the total expenses for these services within the city by the number of discharges within the same city. |
| y5 | Inpatient Medication Expense Ratio（%） | This indicator highlights the proportion of medication expenses during inpatient care relative to the overall hospitalization costs per discharge within the specified city. It is calculated by dividing the average medication cost per discharge (y3) by the average cost per hospitalization (y2). represents the proportion of medication expenses to the overall hospitalization costs per discharge within the specified city. It is calculated by dividing y3 (Average Cost of Medication per Discharge) by y2 (Average Cost per Hospitalization). |
| y6 | Inpatient Diagnostic and Therapeutic Procedure Expense Ratio（%） | This indicator underscores the proportion of expenses associated with diagnostic and therapeutic procedures for diagnosis and treatment during inpatient care, relative to the overall hospitalization costs per discharge within the specified city. It is calculated by dividing the average cost of diagnostic and therapeutic procedures per discharge (y4) by the average cost per hospitalization (y2). |

**APPENDIX B STATA Commands for synth2**

**Set panel data

xtset No year

describe

summarize

** y1’synthetic control method experiment and its spatial placebo effect

synth2 y1 lnx1 x2 lnx4 x5a lnx7 x8 x9 x10 y1(2013) y1(2015) y1(2017), trunit(3) trperiod(2019) xperiod(2012(1) 2021) placebo(unit cut(2)) loo

** y2’synthetic control method experiment and its spatial placebo effect

synth2 y2 lnx1 x2 lnx4 x5a lnx7 x8 x9 x10 y2(2013) y2(2015) y2(2017), trunit(3) trperiod(2019) xperiod(2012(1) 2021) placebo(unit cut(2)) loo

** y3’synthetic control method experiment and its spatial placebo effect

synth2 y3 lnx1 x2 lnx4 x5a lnx7 x8 x9 x10 y3(2013) y3(2015) y3(2017), trunit(3) trperiod(2019) xperiod(2014(1) 2021) placebo(unit cut(2)) loo

**y4’synthetic control method experiment and its spatial placebo effect

synth2 y4 lnx1 x2 lnx4 x5a lnx7 x8 x9 x10 y4(2013) y4(2015) y4(2017), trunit(3) trperiod(2019) xperiod(2014(1) 2021) placebo(unit cut(2)) loo

**y5’synthetic control method experiment and its spatial placebo effect

synth2 y5 lnx1 x2 lnx4 x5a lnx7 x8 x9 x10 y5(2013) y5(2015) y5(2017), trunit(3) trperiod(2019) xperiod(2014(1) 2021) placebo(unit cut(2)) loo

**y6’synthetic control method experiment and its spatial placebo effect

synth2 y6 lnx1 x2 lnx4 x5a lnx7 x8 x9 x10 y6(2013) y6(2015) y6(2017), trunit(3) trperiod(2019) xperiod(2014(1) 2021) placebo(unit cut(2)) loo

**APPENDIX C Trends in Hospitalization Metrics in 21 cities in Sichuan Province from 2012 to 2021**

|  | Table C1 Trends in average hospitalization days per hospitalization in 21 cities in Sichuan Province from 2012 to 2021. | | | | | | | | | | |
| --- | --- | --- | --- | --- | --- | --- | --- | --- | --- | --- | --- |
| No | year | 2012 | 2013 | 2014 | 2015 | 2016 | 2017 | 2018 | 2019 | 2020 | 2021 |
| 1 | Chengdu | 11.00 | 10.86 | 10.56 | 10.67 | 10.44 | 10.80 | 10.14 | 10.04 | 10.58 | 9.85 |
| 2 | Zigong | 10.42 | 10.67 | 11.16 | 11.27 | 11.07 | 11.30 | 12.55 | 12.78 | 13.25 | 13.05 |
| 3 | Panzhihua | 10.47 | 10.45 | 10.64 | 10.69 | 10.55 | 10.72 | 10.97 | 10.42 | 10.05 | 10.05 |
| 4 | Luzhou | 8.42 | 9.08 | 9.12 | 9.61 | 9.15 | 9.21 | 9.52 | 9.65 | 9.49 | 9.86 |
| 5 | Deyang | 10.71 | 10.39 | 10.19 | 10.57 | 10.60 | 10.63 | 11.16 | 11.42 | 12.31 | 11.73 |
| 6 | Mianyang | 10.93 | 10.49 | 10.51 | 10.61 | 10.90 | 11.12 | 11.07 | 10.86 | 11.24 | 10.91 |
| 7 | Guangyuan | 11.95 | 11.57 | 12.30 | 11.94 | 11.85 | 11.55 | 11.47 | 11.05 | 11.03 | 10.61 |
| 8 | Suining | 9.96 | 9.74 | 10.33 | 10.41 | 9.77 | 10.65 | 10.50 | 10.37 | 11.20 | 10.88 |
| 9 | Neijiang | 11.62 | 11.22 | 10.56 | 10.32 | 10.67 | 11.23 | 10.67 | 10.99 | 11.72 | 11.43 |
| 10 | Leshan | 10.32 | 10.40 | 10.02 | 10.24 | 10.26 | 11.91 | 11.71 | 11.31 | 11.57 | 11.52 |
| 11 | Nanchong | 10.18 | 10.11 | 9.73 | 9.94 | 10.15 | 10.53 | 10.60 | 10.21 | 10.34 | 10.59 |
| 12 | Meishan | 9.41 | 9.34 | 9.12 | 9.24 | 9.84 | 9.93 | 10.27 | 10.14 | 9.88 | 10.00 |
| 13 | Yibin | 10.67 | 10.92 | 10.24 | 10.37 | 10.15 | 10.33 | 10.31 | 10.13 | 10.48 | 10.86 |
| 14 | Guangan | 8.68 | 8.20 | 7.95 | 7.87 | 8.25 | 8.72 | 8.93 | 8.61 | 9.20 | 8.98 |
| 15 | Dazhou | 10.62 | 10.04 | 9.40 | 9.76 | 9.79 | 10.28 | 10.52 | 10.20 | 10.27 | 10.41 |
| 16 | Ya'an | 9.90 | 9.11 | 9.26 | 9.37 | 9.49 | 10.03 | 10.37 | 10.12 | 10.88 | 11.26 |
| 17 | Bazhong | 7.89 | 9.36 | 9.26 | 9.44 | 9.29 | 10.08 | 10.18 | 10.35 | 10.33 | 10.36 |
| 18 | Ziyang | 9.42 | 9.54 | 9.90 | 10.01 | 10.65 | 13.40 | 13.61 | 13.25 | 13.39 | 13.79 |
| 19 | Aba | 7.15 | 7.46 | 7.40 | 7.28 | 7.32 | 7.38 | 7.64 | 7.65 | 7.88 | 8.07 |
| 20 | Ganzi | 8.22 | 8.16 | 8.94 | 8.32 | 7.76 | 7.90 | 7.49 | 7.54 | 7.71 | 7.60 |
| 21 | Liangzhou | 8.73 | 8.45 | 7.96 | 7.84 | 7.73 | 7.93 | 8.25 | 8.41 | 8.57 | 8.66 |
|  | Average | 9.84 | 9.79 | 9.74 | 9.80 | 9.79 | 10.27 | 10.38 | 10.26 | 10.54 | 10.50 |

| Table C2 Trends in Average cost per hospitalization (RMB) in 21 cities in Sichuan Province from 2012 to 2021. | | | | | | | | | | | |
| --- | --- | --- | --- | --- | --- | --- | --- | --- | --- | --- | --- |
| No | City | 2012 | 2013 | 2014 | 2015 | 2016 | 2017 | 2018 | 2019 | 2020 | 2021 |
| 1 | Chengdu | ######## | 8759.90 | 9223.00 | 9831.45 | ######## | 10275.84 | 10809.74 | 11334.78 | 12264.09 | 12458.15 |
| 2 | Zigong | 6656.77 | 5658.30 | 6172.15 | 6595.38 | 7078.08 | 7560.09 | 8221.23 | 8671.75 | 9328.73 | 9267.70 |
| 3 | Panzhihua | 8236.91 | 6458.14 | 6801.65 | 7362.37 | 7523.58 | 7756.04 | 8341.84 | 8097.37 | 8698.90 | 8787.79 |
| 4 | Luzhou | 7146.91 | 6748.71 | 7139.46 | 7875.76 | 8038.23 | 8024.60 | 8280.58 | 9124.81 | 9440.11 | 9774.72 |
| 5 | Deyang | 7167.14 | 5830.80 | 6258.48 | 6912.68 | 7202.29 | 7832.47 | 8194.77 | 8634.87 | 9192.19 | 9013.00 |
| 6 | Mianyang | 8106.11 | 6401.46 | 6738.35 | 7107.52 | 7551.38 | 7816.11 | 8511.54 | 8898.44 | 9519.92 | 9480.99 |
| 7 | Guangyuan | 7637.41 | 5668.21 | 6343.07 | 6623.66 | 6620.45 | 6843.42 | 6947.27 | 7240.32 | 7411.36 | 7221.56 |
| 8 | Suining | 6901.65 | 5589.11 | 6151.12 | 6351.69 | 6624.59 | 7010.14 | 7503.53 | 8053.32 | 8708.19 | 8964.40 |
| 9 | Neijiang | 7619.36 | 5415.22 | 5489.34 | 5749.87 | 6265.82 | 6193.66 | 6827.63 | 7387.90 | 8163.46 | 8200.42 |
| 10 | Leshan | 6429.35 | 4841.44 | 4921.26 | 5491.45 | 6145.41 | 6637.51 | 6918.23 | 7481.64 | 8123.11 | 8584.72 |
| 11 | Nanchong | 7597.27 | 6085.03 | 6174.22 | 6194.23 | 6488.84 | 7075.70 | 7576.40 | 7920.29 | 8450.25 | 8691.23 |
| 12 | Meishan | 6577.79 | 5192.84 | 5311.64 | 5770.10 | 6374.19 | 6385.35 | 6902.89 | 7261.34 | 7285.39 | 7305.80 |
| 13 | Yibin | 6639.10 | 5184.71 | 5331.43 | 5617.60 | 5666.60 | 5914.17 | 5863.89 | 6104.18 | 6722.64 | 6927.90 |
| 14 | Guangan | 6403.71 | 4522.84 | 4791.56 | 4867.70 | 5083.45 | 5305.39 | 5851.36 | 6445.12 | 6600.96 | 6351.43 |
| 15 | Dazhou | 8267.85 | 6003.59 | 6410.14 | 6489.85 | 6800.79 | 6631.62 | 7010.85 | 7243.52 | 7338.96 | 7312.47 |
| 16 | Ya'an | 5467.41 | 4190.63 | 4483.91 | 4918.62 | 5264.26 | 5518.56 | 6093.81 | 6391.44 | 7271.35 | 7253.94 |
| 17 | Bazhong | 6407.44 | 5271.34 | 5361.02 | 5219.32 | 5260.71 | 6012.61 | 6411.95 | 6943.31 | 7191.11 | 7161.44 |
| 18 | Ziyang | 5558.47 | 7006.36 | 6102.03 | 6533.41 | 6891.01 | 7447.72 | 7856.67 | 8738.59 | 9392.33 | 9054.69 |
| 19 | Aba | 4240.26 | 3425.17 | 3698.50 | 4002.73 | 4073.10 | 3965.75 | 4429.49 | 4705.98 | 5043.73 | 4797.62 |
| 20 | Ganzi | 4059.01 | 3871.13 | 4011.13 | 4460.88 | 5428.60 | 5942.86 | 5174.86 | 5420.13 | 6086.41 | 5512.91 |
| 21 | Liangzhou | 5744.70 | 4140.55 | 4221.98 | 4290.44 | 4355.02 | 4431.08 | 4878.49 | 5236.42 | 5863.60 | 6026.26 |
|  | Average | 6872.55 | 5536.45 | 5768.35 | 6107.94 | 6416.98 | 6694.32 | 7076.52 | 7492.17 | 8004.61 | 8007.10 |

| Table C3 Trends in average cost of medication per hospitalization (RMB) in 21 cities in Sichuan Province from 2012 to 2021. | | | | | | | | | | | |
| --- | --- | --- | --- | --- | --- | --- | --- | --- | --- | --- | --- |
| No | year | 2012 | 2013 | 2014 | 2015 | 2016 | 2017 | 2018 | 2019 | 2020 | 2021 |
| 1 | Chengdu | 3156.58 | 3282.32 | 3300.77 | 3355.06 | 3153.6 | 2799.81 | 2759.95 | 2802.54 | 2909.76 | 2801.69 |
| 2 | Zigong | 1644.69 | 1774.21 | 1850.8 | 1885.7 | 1855.06 | 1746.22 | 1842.46 | 1887.34 | 1860.48 | 1756.45 |
| 3 | Panzhihua | 1968.23 | 2021.02 | 2030.67 | 2087.11 | 2071.1 | 1923.95 | 1912.49 | 1900.54 | 1968.54 | 1772.06 |
| 4 | Luzhou | 2007.59 | 2435.38 | 2559.6 | 2804.31 | 2748.96 | 2380.04 | 2270.59 | 2388.35 | 2343.47 | 2447.15 |
| 5 | Deyang | 1968.46 | 2103.47 | 2148.16 | 2244.96 | 2226.59 | 2080.38 | 1936.21 | 1982.4 | 1883.3 | 1729.15 |
| 6 | Mianyang | 2152.6 | 2188.05 | 2204.92 | 2212.91 | 2262.71 | 2005.94 | 2066.37 | 2123.26 | 2131.46 | 2048.77 |
| 7 | Guangyuan | 2140.78 | 2073.04 | 2206.96 | 2065.72 | 1908.83 | 1824.19 | 1732.08 | 1726.29 | 1595.36 | 1387.58 |
| 8 | Suining | 1763.28 | 1818.57 | 1862.82 | 1778.17 | 1787.86 | 1677.84 | 1656.26 | 1717.38 | 1660.42 | 1627.27 |
| 9 | Neijiang | 1929.42 | 1765.67 | 1694 | 1667.13 | 1814.17 | 1682.68 | 1759.25 | 1931.19 | 1969.88 | 1881.58 |
| 10 | Leshan | 1747.7 | 1739.69 | 1673.39 | 1782.78 | 1967.63 | 1960.43 | 1853.17 | 1981.74 | 2039.03 | 2142.74 |
| 11 | Nanchong | 2090.66 | 2167.62 | 2147.43 | 1950.4 | 1918.57 | 1975.95 | 2000.05 | 2038.36 | 2041.59 | 2017.35 |
| 12 | Meishan | 1754.66 | 1848.43 | 1810.29 | 1913.99 | 1955.4 | 1900.61 | 2000.44 | 2058.33 | 1783.28 | 1732.04 |
| 13 | Yibin | 1824.36 | 1886.11 | 1865.21 | 1896.88 | 1777.11 | 1713.02 | 1621.56 | 1654.6 | 1721.59 | 1766.71 |
| 14 | Guangan | 1837.37 | 1729.95 | 1725.54 | 1624.74 | 1527.41 | 1421.29 | 1445.75 | 1586.74 | 1472.88 | 1262.21 |
| 15 | Dazhou | 2344.64 | 2294.42 | 2357.43 | 2233.17 | 2162.59 | 1866.73 | 1871.02 | 1922.09 | 1833.54 | 1759.05 |
| 16 | Ya'an | 1454.87 | 1482.89 | 1485.55 | 1547.19 | 1567.06 | 1531.15 | 1527.3 | 1583.81 | 1640.97 | 1569.09 |
| 17 | Bazhong | 1876.28 | 2015.08 | 1806.62 | 1648.77 | 1773.25 | 1747.04 | 1802.74 | 1975.77 | 1725.83 | 1664.76 |
| 18 | Ziyang | 1926.26 | 1858.25 | 1991.63 | 2046.15 | 2055.69 | 2027.91 | 1958.91 | 2054.44 | 2077.09 | 1889.56 |
| 19 | Aba | 1171.27 | 1240.17 | 1199.11 | 1343.62 | 1326.23 | 1190.04 | 1249.49 | 1234.87 | 1221.86 | 1115.01 |
| 20 | Ganzi | 1359.33 | 1858.54 | 1768.63 | 1932.29 | 2084.12 | 1972.93 | 1652.96 | 1714.3 | 1844.07 | 1433.28 |
| 21 | Liangzhou | 1712.38 | 1668.37 | 1645.75 | 1614.56 | 1608 | 1492.29 | 1495.36 | 1560.25 | 1639.46 | 1629.51 |
|  | Average | 1896.734 | 1964.345 | 1968.347 | 1982.648 | 1978.664 | 1853.354 | 1829.258 | 1896.409 | 1874.47 | 1782.524 |

| Table C4 Trends in average cost of diagnostic and treatment procedures per hospitalization (RMB) in 21 cities in Sichuan Province from 2012 to 2021. | | | | | | | | | | | |
| --- | --- | --- | --- | --- | --- | --- | --- | --- | --- | --- | --- |
| No | year | 2012 | 2013 | 2014 | 2015 | 2016 | 2017 | 2018 | 2019 | 2020 | 2021 |
| 1 | Chengdu | 2043.43 | 2678.16 | 2836.71 | 3046.64 | 3237.01 | 3633.36 | 3959.87 | 4214.57 | 4567.36 | 4835.55 |
| 2 | Zigong | 1764.58 | 2267.24 | 2484.08 | 2748.84 | 2971.10 | 3220.79 | 3433.81 | 3801.10 | 4022.16 | 4085.58 |
| 3 | Panzhihua | 1478.98 | 2016.90 | 2207.78 | 2425.14 | 2516.05 | 2565.18 | 2976.14 | 2957.60 | 3089.21 | 3439.19 |
| 4 | Luzhou | 1287.76 | 1966.90 | 2034.84 | 2200.61 | 2368.79 | 2574.30 | 2773.76 | 3231.68 | 3389.22 | 3604.43 |
| 5 | Deyang | 1452.16 | 1955.28 | 2085.90 | 2253.10 | 2394.91 | 2785.42 | 3131.98 | 3330.69 | 3636.06 | 3672.77 |
| 6 | Mianyang | 1505.17 | 1997.58 | 2094.40 | 2234.71 | 2423.37 | 2653.98 | 2931.43 | 3141.37 | 3411.46 | 3503.89 |
| 7 | Guangyuan | 1440.08 | 1880.40 | 2092.97 | 2790.18 | 2287.03 | 2402.86 | 2495.79 | 2635.86 | 2750.28 | 2753.48 |
| 8 | Suining | 1354.08 | 1865.86 | 2114.77 | 2215.35 | 2323.48 | 2577.34 | 2854.98 | 3158.83 | 3577.35 | 3710.26 |
| 9 | Neijiang | 1509.33 | 1861.71 | 1949.65 | 2088.23 | 2163.22 | 2206.50 | 2411.05 | 2675.21 | 2996.21 | 3073.27 |
| 10 | Leshan | 1322.02 | 1644.70 | 1706.54 | 1943.04 | 2096.56 | 2211.01 | 2366.64 | 2475.20 | 2773.93 | 2924.09 |
| 11 | Nanchong | 1151.67 | 1725.59 | 1758.29 | 1895.27 | 2062.87 | 2284.00 | 2549.39 | 2765.38 | 2988.74 | 3120.61 |
| 12 | Meishan | 1349.44 | 1729.35 | 1781.71 | 1921.08 | 2125.67 | 2167.89 | 2377.18 | 2507.04 | 2680.22 | 2818.28 |
| 13 | Yibin | 1131.01 | 1416.44 | 1501.25 | 1610.50 | 1670.08 | 1811.40 | 1910.04 | 2037.70 | 2289.12 | 2453.02 |
| 14 | Guangan | 1167.78 | 1444.10 | 1507.53 | 1592.72 | 1761.00 | 1981.48 | 2173.32 | 2274.29 | 2430.49 | 2392.46 |
| 15 | Dazhou | 1267.89 | 1813.60 | 2037.77 | 2055.34 | 2148.07 | 2121.61 | 2218.06 | 2334.63 | 2397.26 | 2412.36 |
| 16 | Ya'an | 964.95 | 1507.68 | 1660.26 | 1838.59 | 1986.67 | 2016.56 | 2291.82 | 2303.44 | 2637.86 | 2769.64 |
| 17 | Bazhong | 1005.12 | 1676.96 | 1731.06 | 1740.19 | 1890.90 | 2098.66 | 2285.79 | 2496.33 | 2720.18 | 2793.64 |
| 18 | Ziyang | 1952.87 | 1462.59 | 2129.97 | 2225.54 | 2511.14 | 2776.54 | 3100.65 | 3633.20 | 3920.00 | 3739.94 |
| 19 | Aba | 838.45 | 1057.69 | 1108.17 | 1135.72 | 1232.51 | 1202.71 | 1434.34 | 1644.69 | 1813.30 | 1686.15 |
| 20 | Ganzi | 554.34 | 1061.26 | 1076.79 | 1174.39 | 1449.63 | 1665.08 | 1526.86 | 1656.86 | 1920.93 | 1769.89 |
| 21 | Liangzhou | 938.41 | 1223.68 | 1254.05 | 1296.33 | 1323.73 | 1380.36 | 1551.48 | 1705.12 | 1931.85 | 1979.68 |
|  | Average | 1308.55 | 1726.37 | 1864.50 | 2020.55 | 2140.18 | 2301.76 | 2512.11 | 2713.37 | 2949.68 | 3025.63 |

| Table C5 Trends in inpatient medication expense ratio（%） in 21 cities in Sichuan Province from 2012 to 2021. | | | | | | | | | | | |
| --- | --- | --- | --- | --- | --- | --- | --- | --- | --- | --- | --- |
| No | year | 2012 | 2013 | 2014 | 2015 | 2016 | 2017 | 2018 | 2019 | 2020 | 2021 |
| 1 | Chengdu | 27.55 | 37.47 | 35.79 | 34.13 | 31.47 | 27.25 | 25.53 | 24.73 | 23.73 | 22.49 |
| 2 | Zigong | 24.71 | 31.36 | 29.99 | 28.59 | 26.21 | 23.10 | 22.41 | 21.76 | 19.94 | 18.95 |
| 3 | Panzhihua | 23.90 | 31.29 | 29.86 | 28.35 | 27.53 | 24.81 | 22.93 | 23.47 | 22.63 | 20.17 |
| 4 | Luzhou | 28.09 | 36.09 | 35.85 | 35.61 | 34.20 | 29.66 | 27.42 | 26.17 | 24.82 | 25.04 |
| 5 | Deyang | 27.47 | 36.08 | 34.32 | 32.48 | 30.92 | 26.56 | 23.63 | 22.96 | 20.49 | 19.19 |
| 6 | Mianyang | 26.56 | 34.18 | 32.72 | 31.13 | 29.96 | 25.66 | 24.28 | 23.86 | 22.39 | 21.61 |
| 7 | Guangyuan | 28.03 | 36.57 | 34.79 | 31.19 | 28.83 | 26.66 | 24.93 | 23.84 | 21.53 | 19.21 |
| 8 | Suining | 25.55 | 32.54 | 30.28 | 28.00 | 26.99 | 23.93 | 22.07 | 21.33 | 19.07 | 18.15 |
| 9 | Neijiang | 25.32 | 32.61 | 30.86 | 28.99 | 28.95 | 27.17 | 25.77 | 26.14 | 24.13 | 22.94 |
| 10 | Leshan | 27.18 | 35.93 | 34.00 | 32.46 | 32.02 | 29.54 | 26.79 | 26.49 | 25.10 | 24.96 |
| 11 | Nanchong | 27.52 | 35.62 | 34.78 | 31.49 | 29.57 | 27.93 | 26.40 | 25.74 | 24.16 | 23.21 |
| 12 | Meishan | 26.68 | 35.60 | 34.08 | 33.17 | 30.68 | 29.77 | 28.98 | 28.35 | 24.48 | 23.71 |
| 13 | Yibin | 27.48 | 36.38 | 34.99 | 33.77 | 31.36 | 28.96 | 27.65 | 27.11 | 25.61 | 25.50 |
| 14 | Guangan | 28.69 | 38.25 | 36.01 | 33.38 | 30.05 | 26.79 | 24.71 | 24.62 | 22.31 | 19.87 |
| 15 | Dazhou | 28.36 | 38.22 | 36.78 | 34.41 | 31.80 | 28.15 | 26.69 | 26.54 | 24.98 | 24.06 |
| 16 | Ya'an | 26.61 | 35.39 | 33.13 | 31.46 | 29.77 | 27.75 | 25.06 | 24.78 | 22.57 | 21.63 |
| 17 | Bazhong | 29.28 | 38.23 | 33.70 | 31.59 | 33.71 | 29.06 | 28.12 | 28.46 | 24.00 | 23.25 |
| 18 | Ziyang | 34.65 | 26.52 | 32.64 | 31.32 | 29.83 | 27.23 | 24.93 | 23.51 | 22.11 | 20.87 |
| 19 | Aba | 27.62 | 36.21 | 32.42 | 33.57 | 32.56 | 30.01 | 28.21 | 26.24 | 24.23 | 23.24 |
| 20 | Ganzi | 33.49 | 48.01 | 44.09 | 43.32 | 38.39 | 33.20 | 31.94 | 31.63 | 30.30 | 26.00 |
| 21 | Liangzhou | 29.81 | 40.29 | 38.98 | 37.63 | 36.92 | 33.68 | 30.65 | 29.80 | 27.96 | 27.04 |
|  | Average | 27.60 | 35.48 | 34.12 | 32.46 | 30.83 | 27.69 | 25.85 | 25.31 | 23.42 | 22.26 |

| Table C6 Trends in inpatient diagnostic and therapeutic procedure expense ratio（%） in 21 cities in Sichuan Province from 2012 to 2021. | | | | | | | | | | | |
| --- | --- | --- | --- | --- | --- | --- | --- | --- | --- | --- | --- |
| No | year | 2012.00 | 2013.00 | 2014.00 | 2015.00 | 2016.00 | 2017.00 | 2018.00 | 2019.00 | 2020.00 | 2021.00 |
| 1 | Chengdu | 17.83 | 30.57 | 30.76 | 30.99 | 32.31 | 35.36 | 36.63 | 37.18 | 37.24 | 38.81 |
| 2 | Zigong | 26.51 | 40.07 | 40.25 | 41.68 | 41.98 | 42.60 | 41.77 | 43.83 | 43.12 | 44.08 |
| 3 | Panzhihua | 17.96 | 31.23 | 32.46 | 32.94 | 33.44 | 33.07 | 35.68 | 36.53 | 35.51 | 39.14 |
| 4 | Luzhou | 18.02 | 29.14 | 28.50 | 27.94 | 29.47 | 32.08 | 33.50 | 35.42 | 35.90 | 36.88 |
| 5 | Deyang | 20.26 | 33.53 | 33.33 | 32.59 | 33.25 | 35.56 | 38.22 | 38.57 | 39.56 | 40.75 |
| 6 | Mianyang | 18.57 | 31.21 | 31.08 | 31.44 | 32.09 | 33.96 | 34.44 | 35.30 | 35.83 | 36.96 |
| 7 | Guangyuan | 18.86 | 33.17 | 33.00 | 42.12 | 34.54 | 35.11 | 35.92 | 36.41 | 37.11 | 38.13 |
| 8 | Suining | 19.62 | 33.38 | 34.38 | 34.88 | 35.07 | 36.77 | 38.05 | 39.22 | 41.08 | 41.39 |
| 9 | Neijiang | 19.81 | 34.38 | 35.52 | 36.32 | 34.52 | 35.63 | 35.31 | 36.21 | 36.70 | 37.48 |
| 10 | Leshan | 20.56 | 33.97 | 34.68 | 35.38 | 34.12 | 33.31 | 34.21 | 33.08 | 34.15 | 34.06 |
| 11 | Nanchong | 15.16 | 28.36 | 28.48 | 30.60 | 31.79 | 32.28 | 33.65 | 34.92 | 35.37 | 35.91 |
| 12 | Meishan | 20.52 | 33.30 | 33.54 | 33.29 | 33.35 | 33.95 | 34.44 | 34.53 | 36.79 | 38.58 |
| 13 | Yibin | 17.04 | 27.32 | 28.16 | 28.67 | 29.47 | 30.63 | 32.57 | 33.38 | 34.05 | 35.41 |
| 14 | Guangan | 18.24 | 31.93 | 31.46 | 32.72 | 34.64 | 37.35 | 37.14 | 35.29 | 36.82 | 37.67 |
| 15 | Dazhou | 15.34 | 30.21 | 31.79 | 31.67 | 31.59 | 31.99 | 31.64 | 32.23 | 32.66 | 32.99 |
| 16 | Ya'an | 17.65 | 35.98 | 37.03 | 37.38 | 37.74 | 36.54 | 37.61 | 36.04 | 36.28 | 38.18 |
| 17 | Bazhong | 15.69 | 31.81 | 32.29 | 33.34 | 35.94 | 34.90 | 35.65 | 35.95 | 37.83 | 39.01 |
| 18 | Ziyang | 35.13 | 20.88 | 34.91 | 34.06 | 36.44 | 37.28 | 39.47 | 41.58 | 41.74 | 41.30 |
| 19 | Aba | 19.77 | 30.88 | 29.96 | 28.37 | 30.26 | 30.33 | 32.38 | 34.95 | 35.95 | 35.15 |
| 20 | Ganzi | 13.66 | 27.41 | 26.85 | 26.33 | 26.70 | 28.02 | 29.51 | 30.57 | 31.56 | 32.10 |
| 21 | Liangzhou | 16.34 | 29.55 | 29.70 | 30.21 | 30.40 | 31.15 | 31.80 | 32.56 | 32.95 | 32.85 |
|  | Average | 19.04 | 31.18 | 32.32 | 33.08 | 33.35 | 34.38 | 35.50 | 36.22 | 36.85 | 37.79 |

APPENDIX D Treament effect on Hospitalizaiton Metrics

| Table D1 Treament effect on average length of hospital stay （days) | | | |
| --- | --- | --- | --- |
| Time | Actual Panzhihua | Synthetic Panzhihua | Treatment Effect |
| 2019 | 10.42 | 11.21 | -0.79 |
| 2020 | 10.05 | 11.78 | -1.73 |
| 2021 | 10.05 | 11.58 | -1.53 |
| Mean | 10.17 | 11.53 | -1.35 |

| Table D2 Treament effect on average cost per hospitalization (RMB) | | | |
| --- | --- | --- | --- |
| Time | Actual Panzhihua | Synthetic Panzhihua | Treatment Effect |
| 2019 | 8097.37 | 8852.63 | -755.26 |
| 2020 | 8698.90 | 9638.95 | -940.05 |
| 2021 | 8787.79 | 9658.92 | -871.13 |
| Mean | 8528.02 | 9383.50 | -855.48 |

| Table D3 Treament effect on average cost of medication per hospitalization (RMB) | | | |
| --- | --- | --- | --- |
| Time | Actual Panzhihua | Synthetic Panzhihua | Treatment Effect |
| 2019 | 1900.54 | 1900.54 | -28.17 |
| 2020 | 1968.54 | 2000.04 | -31.50 |
| 2021 | 1772.06 | 1917.92 | -145.86 |
| Mean | 1880.38 | 1948.89 | -68.51 |

| Table D4 Treament effect on average cost of diagnostic and therapeutic procedures per hospitalization (RMB) | | | |
| --- | --- | --- | --- |
| Time | Actual Panzhihua | Synthetic Panzhihua | Treatment Effect |
| 2019 | 2957.60 | 3046.39 | -88.79 |
| 2020 | 3089.21 | 3354.74 | -265.53 |
| 2021 | 3439.19 | 3493.98 | -54.79 |
| Mean | 3162.00 | 3298.37 | -136.37 |

| Table D5 Treament effect on inpatient medication expense ratio（%） | | | |
| --- | --- | --- | --- |
| Time | Actual Panzhihua | Synthetic Panzhihua | Treatment Effect |
| 2019 | 23.47 | 22.29 | 1.18 |
| 2020 | 22.63 | 20.62 | 2.01 |
| 2021 | 20.17 | 19.59 | 0.58 |
| Mean | 22.09 | 20.83 | 1.26 |

| Table D6 Treament effect on average cost of diagnostic and therapeutic procedures per hospitalization (RMB) | | | |
| --- | --- | --- | --- |
| Time | Actual Panzhihua | Synthetic Panzhihua | Treatment Effect |
| 2019 | 36.53 | 35.80 | 0.72 |
| 2020 | 35.51 | 36.18 | -0.66 |
| 2021 | 39.14 | 37.45 | 1.69 |
| Mean | 37.06 | 36.47 | 0.58 |

**APPENDIX E Leave-one-out robustness test results**

| Table E1 Leave-one-out robustness test results of average length of hospital Stay (Days) | | | | |
| --- | --- | --- | --- | --- |
|  | Outcome | | Synthetic Outcome (LOO) | |
| Year | Actual Panzhihua | Synthetic Panzhihua | Min | Max |
| 2019.00 | 10.42 | 11.21 | 10.29 | 11.88 |
| 2020.00 | 10.05 | 11.78 | 10.80 | 12.45 |
| 2021.00 | 10.05 | 11.58 | 10.58 | 12.44 |

| Table E2 Leave-one-out robustness test results of average cost per hospitalization (RMB) | | | | |
| --- | --- | --- | --- | --- |
|  | Outcome | | Synthetic Outcome (LOO) | |
| Year | Actual Panzhihua | Synthetic Panzhihua | Min | Max |
| 2019.00 | 8097.37 | 8852.63 | 8477.88 | 9034.67 |
| 2020.00 | 8698.90 | 9638.95 | 9273.91 | 9719.71 |
| 2021.00 | 8787.79 | 9658.92 | 9315.28 | 9692.76 |

| Table E3 Leave-one-out robustness test results of average cost per hospitalization (RMB) | | | | |
| --- | --- | --- | --- | --- |
|  | Outcome | | Synthetic Outcome (LOO) | |
| Year | Actual Panzhihua | Synthetic Panzhihua | Min | Max |
| 2019.00 | 1900.54 | 1928.71 | 1863.48 | 1881.19 |
| 2020.00 | 1968.54 | 2000.04 | 1780.46 | 1836.17 |
| 2021.00 | 1772.06 | 1917.92 | 1628.42 |  |

| Table E4 Leave-one-out robustness test results of diagnostic and therapeutic procedures per hospitalization (RMB) | | | | |
| --- | --- | --- | --- | --- |
|  | Outcome | | Synthetic Outcome (LOO) | |
| Year | Actual Panzhihua | Synthetic Panzhihua | Min | Max |
| 2019.00 | 2957.60 | 3046.39 | 2942.09 | 3183.70 |
| 2020.00 | 3089.21 | 3354.74 | 3261.90 | 3388.55 |
| 2021.00 | 3439.19 | 3493.98 | 3401.35 | 3430.24 |

| Table E5 Leave-one-out robustness test results of inpatient medication expense ratio（%） | | | | |
| --- | --- | --- | --- | --- |
|  | Outcome | | Synthetic Outcome (LOO) | |
| Year | Actual Panzhihua | Synthetic Panzhihua | Min | Max |
| 2019.00 | 23.47 | 22.29 | 22.33 | 22.69 |
| 2020.00 | 22.63 | 20.62 | 20.43 | 20.95 |
| 2021.00 | 20.17 | 19.59 | 19.45 | 19.89 |

| Table E6 inpatient diagnostic and therapeutic procedure expense ratio（%） | | | | |
| --- | --- | --- | --- | --- |
|  | Outcome | | Synthetic Outcome (LOO) | |
| Year | Actual Panzhihua | Synthetic Panzhihua | Min | Max |
| 2019.00 | 36.53 | 35.80 | 35.42 | 37.10 |
| 2020.00 | 35.51 | 36.18 | 35.76 | 37.98 |
| 2021.00 | 39.14 | 37.45 | 37.20 | 38.92 |
